# Supplementary material for: Experiencing the diagnosis of pancreatic cancer as an acute threat: a grounded theory study on the diagnostic process of people with pancreatic adenocarcinoma
Source: Springer Nature journal article supplement (doi:10.1007/s16024-023-00402-9), 2024-01-15
Supplement: MOESM2 [file 26630814]

## Appendix 2: COnsolidated criteria for REporting Qualitative studies (COREQ): 32-item checklist

Adapted from: Tong, A., Sainsbury, P., & Craig, J. (2007). Consolidated criteria for reporting qualitative research (COREQ): a 32-item checklist for interviews and focus groups. *International journal for quality in health care : journal of the International Society for Quality in Health Care*, 19(6), 349–357. <https://doi.org/10.1093/intqhc/mzm042>

| No                                             | Item                                     | Guide questions/description                                                                                                                                     | Answer/explanation                 |
|------------------------------------------------|------------------------------------------|-----------------------------------------------------------------------------------------------------------------------------------------------------------------|------------------------------------|
| <b>Domain 1: Research team and reflexivity</b> |                                          |                                                                                                                                                                 |                                    |
| Personal Characteristics                       |                                          |                                                                                                                                                                 |                                    |
| 1.                                             | Interviewer/facilitator                  | Which author/s conducted the interview or focus group?                                                                                                          | PR, see p. 18, l. 493-4            |
| 2.                                             | Credentials                              | What were the researcher's credentials? <i>E.g. PhD, MD</i>                                                                                                     | see p. 1, l. 9                     |
| 3.                                             | Occupation                               | What was their occupation at the time of the study?                                                                                                             | see p. 1, l. 8-23, p. 7, l. 175-80 |
| 4.                                             | Gender                                   | Was the researcher male or female?                                                                                                                              | Male                               |
| 5.                                             | Experience and training                  | What experience or training did the researcher have?                                                                                                            | see p. 7, l. 175-80                |
| Relationship with participants                 |                                          |                                                                                                                                                                 |                                    |
| 6.                                             | Relationship established                 | Was a relationship established prior to study commencement?                                                                                                     | no, see p. 5, l. 122-8             |
| 7.                                             | Participant knowledge of the interviewer | What did the participants know about the researcher? <i>e.g. personal goals, reasons for doing the research</i>                                                 | see p. 5, l. 122-8                 |
| 8.                                             | Interviewer characteristics              | What characteristics were reported about the interviewer/facilitator? <i>e.g. Bias, assumptions, reasons and interests in the research topic</i>                | Doctoral student status            |
| <b>Domain 2: study design</b>                  |                                          |                                                                                                                                                                 |                                    |
| Theoretical framework                          |                                          |                                                                                                                                                                 |                                    |
| 9.                                             | Methodological orientation and Theory    | What methodological orientation was stated to underpin the study? <i>e.g. grounded theory, discourse analysis, ethnography, phenomenology, content analysis</i> | see p. 5, l. 114-8                 |
| Participant selection                          |                                          |                                                                                                                                                                 |                                    |
| 10.                                            | Sampling                                 | How were participants selected? <i>e.g. purposive, convenience, consecutive, snowball</i>                                                                       | see p. 5, l. 129-33                |
| 11.                                            | Method of approach                       | How were participants approached? <i>e.g. face-to-face, telephone, mail, email</i>                                                                              | see p. 5, l. 122-8                 |
| 12.                                            | Sample size                              | How many participants were in the study?                                                                                                                        | see p. 5, l. 133-5, Table 1        |
| 13.                                            | Non-participation                        | How many people refused to participate or dropped out? Reasons?                                                                                                 | see p. 5, l. 136                   |
| Setting                                        |                                          |                                                                                                                                                                 |                                    |
| 14.                                            | Setting of data collection               | Where was the data collected? <i>e.g. home, clinic, workplace</i>                                                                                               | see p. 6, l. 140-3                 |
| 15.                                            | Presence of non-participants             | Was anyone else present besides the participants and researchers?                                                                                               | No                                 |
| 16.                                            | Description of sample                    | What are the important characteristics of the sample? <i>e.g. demographic data, date</i>                                                                        | see p. 6, Table 1                  |
| Data collection                                |                                          |                                                                                                                                                                 |                                    |
| 17.                                            | Interview guide                          | Were questions, prompts, guides provided by the authors? Was it pilot tested?                                                                                   | no, not to participants/yes        |

|                                         |                                |                                                                                                                                          |                                      |
|-----------------------------------------|--------------------------------|------------------------------------------------------------------------------------------------------------------------------------------|--------------------------------------|
| 18.                                     | Repeat interviews              | Were repeat interviews carried out? If yes, how many?                                                                                    | No                                   |
| 19.                                     | Audio/visual recording         | Did the research use audio or visual recording to collect the data?                                                                      | see p. 6, l. 140-9                   |
| 20.                                     | Field notes                    | Were field notes made during and/or after the interview or focus group?                                                                  | see p. 6, l. 146-8                   |
| 21.                                     | Duration                       | What was the duration of the interviews or focus group?                                                                                  | see p. 6, Table 1                    |
| 22.                                     | Data saturation                | Was data saturation discussed?                                                                                                           | see p. 7, l. 167-180                 |
| 23.                                     | Transcripts returned           | Were transcripts returned to participants for comment and/or correction?                                                                 | No                                   |
| <b>Domain 3: analysis and findingsz</b> |                                |                                                                                                                                          |                                      |
| Data analysis                           |                                |                                                                                                                                          |                                      |
| 24.                                     | Number of data coders          | How many data coders coded the data?                                                                                                     | see 1-3, p. 7, l. 175-7              |
| 25.                                     | Description of the coding tree | Did authors provide a description of the coding tree?                                                                                    | n/a                                  |
| 26.                                     | Derivation of themes           | Were themes identified in advance or derived from the data?                                                                              | from the data, see p. 6-7, l. 150-74 |
| 27.                                     | Software                       | What software, if applicable, was used to manage the data?                                                                               | MAXQDA 2022                          |
| 28.                                     | Participant checking           | Did participants provide feedback on the findings?                                                                                       | partly yes, see p. 6, l. 145-6       |
| Reporting                               |                                |                                                                                                                                          |                                      |
| 29.                                     | Quotations presented           | Were participant quotations presented to illustrate the themes / findings? Was each quotation identified? e.g. <i>participant number</i> | yes/no                               |
| 30.                                     | Data and findings consistent   | Was there consistency between the data presented and the findings?                                                                       | yes                                  |
| 31.                                     | Clarity of major themes        | Were major themes clearly presented in the findings?                                                                                     | yes                                  |
| 32.                                     | Clarity of minor themes        | Is there a description of diverse cases or discussion of minor themes?                                                                   | yes                                  |
